# Supplementary material for: Using a Polygenic Score to Predict the Risk of Developing Primary Osteoporosis
Source: MDPI journal article supplement (doi:10.3390/ijms231710021), 2022-09-02
Supplement: s1 [file s1]

**Table S1.** Characteristic of studied loci from the GEFOS Consortium's GWAS replication as part of a study of a sample of women from the Volga-Ural region of Russia

| №  | Polymorphic loci ID | Chromosome | Genomic position |
|----|---------------------|------------|------------------|
| 1  | rs2295294           | 1          | 10130826         |
| 2  | rs7417366           | 1          | 168494349        |
| 3  | rs13464             | 17         | 16030775         |
| 4  | rs10510373          | 3          | 7869340          |
| 5  | rs4832734           | 4          | 37701376         |
| 6  | rs6830890           | 4          | 111597970        |
| 7  | rs17284960          | 5          | 164196496        |
| 8  | rs28425             | 21         | 41372958         |
| 9  | rs1405534           | 8          | 25152611         |
| 10 | rs10756362          | 9          | 12344883         |
| 11 | rs11788458          | 9          | 111855741        |
| 12 | rs13734             | 20         | 17614084         |
| 13 | rs6231              | 5          | 96421888         |
| 14 | rs1282108           | 5          | 101445219        |
| 15 | rs129333            | 22         | 36757245         |
| 16 | rs1048146           | 16         | 90043663         |
| 17 | rs2717096           | 18         | 77217086         |
| 18 | rs1514348           | 6          | 151861180        |
| 19 | rs3020314           | 6          | 151949537        |
| 20 | rs1062033           | 15         | 51255741         |
| 21 | rs28757190          | 15         | 51215771         |
| 22 | rs1801725           | 3          | 122284910        |
| 23 | rs1801197           | 7          | 93426441         |
| 24 | rs182549            | 2          | 135859184        |
| 25 | rs9630182           | 11         | 13598625         |
| 26 | rs7125774           | 11         | 13597257         |
| 27 | rs10518716          | 15         | 67202485         |
| 28 | rs17054320          | 6          | 150841717        |
| 29 | rs2228570           | 12         | 47879112         |
| 30 | rs1544410           | 12         | 47846052         |
| 31 | rs1107946           | 17         | 50203629         |
| 32 | rs2412298           | 17         | 50203294         |
| 33 | rs180012            | 6          | 16309435         |
| 34 | rs545382            | 11         | 68403545         |

|    |            |    |           |
|----|------------|----|-----------|
| 35 | rs2277268  | 11 | 68406654  |
| 36 | rs9340799  | 6  | 151842246 |
| 37 | rs2120461  | 1  | 8387662   |
| 38 | rs7521902  | 1  | 22164231  |
| 39 | rs6426749  | 1  | 22384980  |
| 40 | rs12137389 | 1  | 45472714  |
| 41 | rs12407028 | 1  | 68182033  |
| 42 | rs11809524 | 1  | 102993981 |
| 43 | rs479336   | 1  | 172230433 |
| 44 | rs12120297 | 1  | 223377942 |
| 45 | rs13413210 | 2  | 29349779  |
| 46 | rs7584262  | 2  | 42023409  |
| 47 | rs4233949  | 2  | 54432570  |
| 48 | rs730402   | 2  | 59867571  |
| 49 | rs17040773 | 2  | 111742458 |
| 50 | rs1878526  | 2  | 118281022 |
| 51 | rs11675051 | 2  | 190581704 |
| 52 | rs12995369 | 2  | 201962257 |
| 53 | rs6436440  | 2  | 223840189 |
| 54 | rs2291296  | 3  | 25384391  |
| 55 | rs7427438  | 3  | 29353234  |
| 56 | rs430727   | 3  | 41087073  |
| 57 | rs1026364  | 3  | 113651163 |
| 58 | rs3755955  | 4  | 1000626   |
| 59 | rs6532023  | 4  | 87852697  |
| 60 | rs1366594  | 5  | 89080244  |
| 61 | rs4957742  | 5  | 105837267 |
| 62 | rs9466056  | 6  | 21384382  |
| 63 | rs11755164 | 6  | 44671447  |
| 64 | rs13204965 | 6  | 126845927 |
| 65 | rs4869742  | 6  | 151586613 |
| 66 | rs7751941  | 6  | 151625523 |
| 67 | rs7788807  | 7  | 4728407   |
| 68 | rs6959212  | 7  | 38088724  |
| 69 | rs2282930  | 7  | 50686982  |
| 70 | rs4727338  | 7  | 96491363  |
| 71 | rs13245690 | 7  | 121145010 |

|     |            |    |           |
|-----|------------|----|-----------|
| 72  | rs3801387  | 7  | 121334711 |
| 73  | rs1670346  | 7  | 158474569 |
| 74  | rs7017914  | 8  | 70678968  |
| 75  | rs13272568 | 8  | 78122224  |
| 76  | rs2062377  | 8  | 118995181 |
| 77  | rs4240467  | 9  | 121548011 |
| 78  | rs7851693  | 9  | 130603440 |
| 79  | rs3905706  | 10 | 28191013  |
| 80  | rs7071206  | 10 | 77641558  |
| 81  | rs2784767  | 10 | 80134738  |
| 82  | rs7084921  | 10 | 100054045 |
| 83  | rs11602954 | 11 | 202856    |
| 84  | rs7108738  | 11 | 15688538  |
| 85  | rs10835187 | 11 | 27484130  |
| 86  | rs163879   | 11 | 30930127  |
| 87  | rs7932354  | 11 | 46700671  |
| 88  | rs3736228  | 11 | 68433827  |
| 89  | rs2887571  | 12 | 1529005   |
| 90  | rs11048046 | 12 | 25451875  |
| 91  | rs7953528  | 12 | 27864226  |
| 92  | rs2016266  | 12 | 53334171  |
| 93  | rs736825   | 12 | 54023792  |
| 94  | rs1053051  | 12 | 106973447 |
| 95  | rs7326472  | 13 | 42405815  |
| 96  | rs1286083  | 14 | 90976435  |
| 97  | rs11623869 | 14 | 103417296 |
| 98  | rs2118784  | 15 | 51158988  |
| 99  | rs9921222  | 16 | 325782    |
| 100 | rs13336428 | 16 | 1482462   |
| 101 | rs4985155  | 16 | 15035602  |
| 102 | rs1564981  | 16 | 50952397  |
| 103 | rs1566045  | 16 | 50987892  |
| 104 | rs4790881  | 17 | 2165638   |
| 105 | rs4792909  | 17 | 43721456  |
| 106 | rs227584   | 17 | 44148179  |
| 107 | rs1864325  | 17 | 45900461  |
| 108 | rs7226305  | 17 | 54032130  |

|     |            |    |           |
|-----|------------|----|-----------|
| 109 | rs7217932  | 17 | 71952875  |
| 110 | rs4796995  | 18 | 13708575  |
| 111 | rs884205   | 18 | 62387624  |
| 112 | rs7257450  | 19 | 17377798  |
| 113 | rs10416218 | 19 | 33108221  |
| 114 | rs3790160  | 20 | 10659340  |
| 115 | rs4817775  | 21 | 36112764  |
| 116 | rs4820539  | 22 | 23135783  |
| 117 | rs5934507  | X  | 8949165   |
| 118 | rs5926033  | X  | 22666244  |
| 119 | rs5952638  | X  | 44835659  |
| 120 | rs4492531  | X  | 75812296  |
| 121 | rs964181   | X  | 151873604 |
