# Supplementary material for: Using a Polygenic Score to Predict the Risk of Developing Primary Osteoporosis
Source: MDPI journal article supplement (doi:10.3390/ijms231710021), 2022-09-02
Supplement: s1 [file s1]

Table S4. Characteristics of the studied polymorphic variants included in the fracture prediction model at a low level of BMD

| SNP        | Risk allele | ln OR | OR    |
|------------|-------------|-------|-------|
| rs2120461  | T           | 0,241 | 1,272 |
| rs2295294  | T           | 0,218 | 1,243 |
| rs7521902  | A           | 0,188 | 1,207 |
| rs6426749  | G           | 0,226 | 1,253 |
| rs12137389 | C           | 0,652 | 1,920 |
| rs12407028 | T           | 0,094 | 1,099 |
| rs1031820  | G           | 0,183 | 1,201 |
| rs11809524 | T           | 0,784 | 2,191 |
| rs7417366  | G           | 0,072 | 1,075 |
| rs479336   | T           | 0,088 | 1,092 |
| rs12120297 | C           | 0,321 | 1,378 |
| rs13413210 | A           | 0,078 | 1,081 |
| rs7584262  | C           | 0,075 | 1,078 |
| rs4233949  | G           | 0,256 | 1,292 |
| rs730402   | A           | 0,204 | 1,226 |
| rs17040773 | A           | 0,219 | 1,245 |
| rs1878526  | A           | 0,267 | 1,306 |
| rs182549   | A           | 0,268 | 1,307 |
| rs11675051 | A           | 0,131 | 1,140 |
| rs12995369 | G           | 0,105 | 1,111 |
| rs6436440  | A           | 0,108 | 1,114 |
| rs10510373 | G           | 0,333 | 1,395 |
| rs2291296  | A           | 0,186 | 1,204 |
| rs7427438  | A           | 0,242 | 1,274 |
| rs430727   | C           | 0,015 | 1,015 |
| rs1026364  | G           | 0,075 | 1,078 |
| rs1801725  | T           | 0,435 | 1,545 |
| rs344081   | T           | 0,164 | 1,178 |
| rs3755955  | A           | 0,357 | 1,429 |
| rs4832734  | T           | 0,191 | 1,211 |
| rs6532023  | T           | 0,293 | 1,340 |
| rs6830890  | A           | 0,005 | 1,005 |
| rs6854081  | G           | 0,275 | 1,316 |
| rs1366594  | C           | 0,214 | 1,239 |
| rs6231     | A           | 0,045 | 1,046 |
| rs1282108  | C           | 0,038 | 1,039 |
| rs4957742  | A           | 0,181 | 1,199 |
| rs1054204  | G           | 0,004 | 1,004 |
| rs2910164  | C           | 0,063 | 1,065 |
| rs17284960 | C           | 0,066 | 1,068 |
| rs180012   | G           | 0,024 | 1,024 |
| rs9466056  | A           | 0,141 | 1,151 |
| rs11755164 | T           | 0,018 | 1,018 |
| rs13204965 | A           | 0,304 | 1,355 |
| rs2745426  | T           | 0,218 | 1,243 |

|            |   |       |       |
|------------|---|-------|-------|
| rs17054320 | A | 0,100 | 1,105 |
| rs4869742  | T | 0,284 | 1,328 |
| rs7751941  | G | 0,322 | 1,380 |
| rs9340799  | T | 0,057 | 1,059 |
| rs1514348  | G | 0,113 | 1,120 |
| rs3020314  | C | 0,006 | 1,006 |
| rs1712     | C | 0,073 | 1,076 |
| rs7788807  | C | 0,341 | 1,407 |
| rs10226308 | A | 0,176 | 1,192 |
| rs6959212  | C | 0,240 | 1,271 |
| rs2282930  | A | 0,071 | 1,074 |
| rs1801197  | C | 0,165 | 1,179 |
| rs4727338  | G | 0,112 | 1,119 |
| rs13245690 | G | 0,305 | 1,357 |
| rs3801387  | G | 0,021 | 1,021 |
| rs7812088  | G | 0,127 | 1,135 |
| rs1670346  | A | 0,264 | 1,302 |
| rs1405534  | C | 0,208 | 1,231 |
| rs7017914  | A | 0,094 | 1,099 |
| rs13272568 | C | 0,093 | 1,098 |
| rs7844539  | C | 0,108 | 1,114 |
| rs3102734  | T | 0,307 | 1,360 |
| rs2073618  | C | 0,126 | 1,134 |
| rs2062377  | A | 0,108 | 1,114 |
| rs10756362 | G | 0,020 | 1,020 |
| rs11788458 | G | 0,125 | 1,133 |
| rs4240467  | C | 0,256 | 1,292 |
| rs7851693  | C | 0,085 | 1,089 |
| rs3905706  | C | 0,139 | 1,149 |
| rs10793442 | A | 0,420 | 1,522 |
| rs7071206  | T | 0,057 | 1,059 |
| rs2784767  | T | 0,255 | 1,290 |
| rs7084921  | C | 0,196 | 1,216 |
| rs11602954 | A | 0,311 | 1,365 |
| rs7125774  | T | 0,117 | 1,124 |
| rs9630182  | C | 0,067 | 1,069 |
| rs7108738  | T | 0,020 | 1,020 |
| rs10835187 | T | 0,017 | 1,017 |
| rs163879   | C | 0,031 | 1,032 |
| rs7932354  | C | 0,021 | 1,021 |
| rs198470   | T | 0,984 | 2,676 |
| rs545382   | C | 0,480 | 1,616 |
| rs2277268  | A | 0,878 | 2,406 |
| rs3736228  | T | 0,039 | 1,040 |
| rs5854     | T | 0,136 | 1,146 |
| rs2887571  | G | 0,397 | 1,487 |
| rs11048046 | A | 0,383 | 1,466 |
| rs7953528  | A | 0,211 | 1,235 |
| rs11540149 | A | 0,514 | 1,672 |

|            |   |       |       |
|------------|---|-------|-------|
| rs1544410  | A | 0,004 | 1,004 |
| rs2228570  | A | 0,389 | 1,475 |
| rs2016266  | G | 0,096 | 1,101 |
| rs11614913 | T | 0,262 | 1,299 |
| rs736825   | G | 0,007 | 1,007 |
| rs1053051  | C | 0,118 | 1,125 |
| rs7326472  | G | 0,384 | 1,468 |
| rs1286083  | C | 0,358 | 1,430 |
| rs11623869 | T | 0,101 | 1,106 |
| rs2118784  | A | 0,136 | 1,146 |
| rs28757190 | C | 1,299 | 3,667 |
| rs1062033  | G | 0,000 | 1,000 |
| rs10518716 | C | 0,174 | 1,190 |
| rs9921222  | T | 0,012 | 1,012 |
| rs13336428 | G | 0,063 | 1,065 |
| rs4985155  | G | 0,189 | 1,208 |
| rs1564981  | G | 0,096 | 1,101 |
| rs1566045  | T | 0,229 | 1,257 |
| rs1048146  | A | 0,085 | 1,089 |
| rs4790881  | A | 0,030 | 1,030 |
| rs13464    | A | 0,146 | 1,157 |
| rs4792909  | G | 0,172 | 1,188 |
| rs227584   | A | 0,145 | 1,156 |
| rs1864325  | T | 0,002 | 1,002 |
| rs1061947  | C | 0,214 | 1,239 |
| rs2412298  | A | 0,033 | 1,034 |
| rs1107946  | G | 0,300 | 1,350 |
| rs7226305  | C | 0,196 | 1,217 |
| rs7217932  | G | 0,019 | 1,019 |
| rs1042673  | G | 0,081 | 1,084 |
| rs4796995  | A | 0,387 | 1,472 |
| rs884205   | C | 0,051 | 1,052 |
| rs2717096  | G | 0,237 | 1,268 |
| rs7257450  | G | 0,110 | 1,116 |
| rs10416218 | T | 0,034 | 1,035 |
| rs3790160  | C | 0,059 | 1,061 |
| rs13734    | T | 0,293 | 1,341 |
| rs4817775  | C | 0,160 | 1,174 |
| rs28425    | G | 0,582 | 1,790 |
| rs4820539  | A | 0,003 | 1,003 |
| rs129333   | C | 0,476 | 1,610 |
| rs5934507  | A | 0,100 | 1,105 |
| rs5926033  | C | 0,588 | 1,800 |
| rs5952638  | A | 0,504 | 1,655 |
| rs4492531  | A | 0,187 | 1,206 |
| rs964181   | C | 0,287 | 1,332 |
