# Supplementary material for: Using a Polygenic Score to Predict the Risk of Developing Primary Osteoporosis
Source: MDPI journal article supplement (doi:10.3390/ijms231710021), 2022-09-02
Supplement: s1 [file s1]

**Table S2.** Characteristics of the studied polymorphic variants included in the fracture prediction model

| SNP        | Risk allele | ln OR | OR    |
|------------|-------------|-------|-------|
| rs2120461  | T           | 0,130 | 1,139 |
| rs2295294  | A           | 0,007 | 1,007 |
| rs7521902  | A           | 0,145 | 1,156 |
| rs6426749  | G           | 0,025 | 1,025 |
| rs12137389 | C           | 0,324 | 1,383 |
| rs12407028 | C           | 0,016 | 1,016 |
| rs1031820  | A           | 0,144 | 1,155 |
| rs11809524 | T           | 0,326 | 1,386 |
| rs7417366  | A           | 0,029 | 1,029 |
| rs479336   | T           | 0,123 | 1,131 |
| rs12120297 | C           | 0,008 | 1,008 |
| rs13413210 | C           | 0,232 | 1,261 |
| rs7584262  | C           | 0,115 | 1,122 |
| rs4233949  | G           | 0,059 | 1,061 |
| rs730402   | G           | 0,031 | 1,032 |
| rs17040773 | A           | 0,265 | 1,304 |
| rs1878526  | A           | 0,212 | 1,236 |
| rs182549   | A           | 0,207 | 1,230 |
| rs11675051 | A           | 0,026 | 1,026 |
| rs12995369 | A           | 0,050 | 1,051 |
| rs6436440  | A           | 0,052 | 1,053 |
| rs10510373 | G           | 0,415 | 1,515 |
| rs2291296  | G           | 0,028 | 1,028 |
| rs7427438  | C           | 0,031 | 1,031 |
| rs430727   | T           | 0,017 | 1,017 |
| rs1026364  | G           | 0,043 | 1,044 |
| rs1801725  | T           | 0,105 | 1,111 |
| rs344081   | T           | 0,173 | 1,189 |
| rs3755955  | G           | 0,051 | 1,052 |
| rs4832734  | T           | 0,157 | 1,170 |
| rs6532023  | T           | 0,251 | 1,285 |
| rs6830890  | A           | 0,099 | 1,104 |
| rs6854081  | G           | 0,130 | 1,139 |
| rs1366594  | C           | 0,006 | 1,006 |
| rs6231     | A           | 0,038 | 1,039 |
| rs1282108  | C           | 0,021 | 1,021 |
| rs4957742  | A           | 0,136 | 1,146 |
| rs1054204  | G           | 0,010 | 1,010 |
| rs2910164  | G           | 0,100 | 1,105 |
| rs17284960 | C           | 0,265 | 1,304 |
| rs180012   | T           | 0,116 | 1,123 |
| rs9466056  | G           | 0,021 | 1,021 |

|            |   |       |       |
|------------|---|-------|-------|
| rs11755164 | C | 0,077 | 1,080 |
| rs13204965 | A | 0,151 | 1,163 |
| rs2745426  | T | 0,026 | 1,026 |
| rs17054320 | T | 0,262 | 1,299 |
| rs4869742  | T | 0,149 | 1,161 |
| rs7751941  | G | 0,012 | 1,012 |
| rs9340799  | T | 0,114 | 1,121 |
| rs1514348  | G | 0,069 | 1,071 |
| rs3020314  | C | 0,034 | 1,035 |
| rs1712     | T | 0,011 | 1,011 |
| rs7788807  | C | 0,268 | 1,308 |
| rs10226308 | A | 0,000 | 1,000 |
| rs6959212  | C | 0,040 | 1,041 |
| rs2282930  | A | 0,028 | 1,028 |
| rs1801197  | C | 0,267 | 1,306 |
| rs4727338  | G | 0,075 | 1,078 |
| rs13245690 | G | 0,156 | 1,169 |
| rs3801387  | G | 0,027 | 1,027 |
| rs7812088  | G | 0,086 | 1,090 |
| rs1670346  | A | 0,205 | 1,228 |
| rs1405534  | C | 0,018 | 1,018 |
| rs7017914  | G | 0,122 | 1,130 |
| rs13272568 | C | 0,209 | 1,233 |
| rs7844539  | A | 0,084 | 1,088 |
| rs3102734  | T | 0,413 | 1,511 |
| rs2073618  | C | 0,060 | 1,062 |
| rs2062377  | T | 0,010 | 1,010 |
| rs10756362 | G | 0,091 | 1,095 |
| rs11788458 | G | 0,039 | 1,040 |
| rs4240467  | C | 0,200 | 1,221 |
| rs7851693  | G | 0,014 | 1,014 |
| rs3905706  | C | 0,125 | 1,133 |
| rs10793442 | A | 0,234 | 1,264 |
| rs7071206  | C | 0,082 | 1,085 |
| rs2784767  | T | 0,148 | 1,159 |
| rs7084921  | C | 0,093 | 1,098 |
| rs11602954 | A | 0,181 | 1,198 |
| rs7125774  | T | 0,051 | 1,052 |
| rs9630182  | C | 0,040 | 1,041 |
| rs7108738  | T | 0,029 | 1,029 |
| rs10835187 | T | 0,100 | 1,105 |
| rs163879   | T | 0,199 | 1,220 |
| rs7932354  | T | 0,074 | 1,077 |
| rs198470   | T | 0,337 | 1,401 |
| rs545382   | C | 0,259 | 1,296 |
| rs2277268  | A | 0,054 | 1,055 |

|            |   |       |       |
|------------|---|-------|-------|
| rs3736228  | C | 0,154 | 1,166 |
| rs5854     | T | 0,043 | 1,044 |
| rs2887571  | G | 0,211 | 1,235 |
| rs11048046 | A | 0,115 | 1,122 |
| rs7953528  | A | 0,162 | 1,176 |
| rs11540149 | A | 0,320 | 1,377 |
| rs1544410  | G | 0,211 | 1,235 |
| rs2228570  | A | 0,265 | 1,303 |
| rs2016266  | G | 0,043 | 1,044 |
| rs11614913 | T | 0,117 | 1,124 |
| rs736825   | C | 0,088 | 1,092 |
| rs1053051  | C | 0,083 | 1,087 |
| rs7326472  | G | 0,218 | 1,244 |
| rs1286083  | C | 0,125 | 1,133 |
| rs11623869 | T | 0,058 | 1,060 |
| rs2118784  | A | 0,018 | 1,018 |
| rs28757190 | C | 0,218 | 1,244 |
| rs1062033  | C | 0,007 | 1,007 |
| rs10518716 | G | 0,110 | 1,116 |
| rs9921222  | C | 0,027 | 1,027 |
| rs13336428 | A | 0,216 | 1,241 |
| rs4985155  | G | 0,029 | 1,029 |
| rs1564981  | A | 0,000 | 1,000 |
| rs1566045  | T | 0,121 | 1,129 |
| rs1048146  | A | 0,038 | 1,039 |
| rs4790881  | A | 0,136 | 1,146 |
| rs13464    | G | 0,002 | 1,002 |
| rs4792909  | G | 0,042 | 1,043 |
| rs227584   | A | 0,248 | 1,282 |
| rs1864325  | C | 0,081 | 1,084 |
| rs1061947  | C | 0,025 | 1,025 |
| rs2412298  | A | 0,112 | 1,119 |
| rs1107946  | G | 0,271 | 1,311 |
| rs7226305  | C | 0,073 | 1,076 |
| rs7217932  | A | 0,016 | 1,016 |
| rs1042673  | G | 0,070 | 1,073 |
| rs4796995  | A | 0,111 | 1,117 |
| rs884205   | A | 0,112 | 1,119 |
| rs2717096  | A | 0,126 | 1,134 |
| rs7257450  | A | 0,086 | 1,090 |
| rs10416218 | T | 0,265 | 1,304 |
| rs3790160  | T | 0,080 | 1,083 |
| rs13734    | T | 0,228 | 1,256 |
| rs4817775  | C | 0,022 | 1,022 |
| rs28425    | T | 0,347 | 1,415 |
| rs4820539  | A | 0,086 | 1,090 |

|           |   |       |       |
|-----------|---|-------|-------|
| rs129333  | C | 0,146 | 1,157 |
| rs5934507 | A | 0,075 | 1,078 |
| rs5926033 | C | 0,412 | 1,510 |
| rs5952638 | A | 0,644 | 1,904 |
| rs4492531 | A | 0,016 | 1,016 |
| rs964181  | C | 0,135 | 1,145 |
