# Supplementary material for: Using a Polygenic Score to Predict the Risk of Developing Primary Osteoporosis
Source: MDPI journal article supplement (doi:10.3390/ijms231710021), 2022-09-02
Supplement: s1 [file s1]

Table S3. Characteristics of the studied polymorphic variants included in the fracture prediction model

| SNP        | Risk allele | ln OR | OR    |
|------------|-------------|-------|-------|
| rs2120461  | T           | 0,076 | 1,079 |
| rs2295294  | T           | 0,166 | 1,180 |
| rs7521902  | A           | 0,101 | 1,106 |
| rs6426749  | G           | 0,299 | 1,348 |
| rs12137389 | C           | 0,631 | 1,879 |
| rs12407028 | T           | 0,119 | 1,126 |
| rs1031820  | G           | 0,234 | 1,264 |
| rs11809524 | T           | 0,364 | 1,439 |
| rs7417366  | G           | 0,083 | 1,087 |
| rs479336   | G           | 0,010 | 1,010 |
| rs12120297 | C           | 0,264 | 1,302 |
| rs13413210 | A           | 0,122 | 1,130 |
| rs7584262  | T           | 0,094 | 1,099 |
| rs4233949  | G           | 0,291 | 1,338 |
| rs730402   | A           | 0,266 | 1,305 |
| rs17040773 | A           | 0,031 | 1,032 |
| rs1878526  | A           | 0,203 | 1,225 |
| rs182549   | A           | 0,166 | 1,180 |
| rs11675051 | A           | 0,112 | 1,118 |
| rs12995369 | G           | 0,201 | 1,223 |
| rs6436440  | G           | 0,028 | 1,028 |
| rs10510373 | G           | 0,077 | 1,080 |
| rs2291296  | A           | 0,099 | 1,104 |
| rs7427438  | A           | 0,333 | 1,395 |
| rs430727   | C           | 0,053 | 1,054 |
| rs1026364  | G           | 0,037 | 1,038 |
| rs1801725  | T           | 0,377 | 1,458 |
| rs344081   | C           | 0,081 | 1,084 |
| rs3755955  | A           | 0,329 | 1,389 |
| rs4832734  | T           | 0,163 | 1,177 |
| rs6532023  | T           | 0,059 | 1,061 |
| rs6830890  | G           | 0,089 | 1,093 |
| rs6854081  | G           | 0,146 | 1,157 |
| rs1366594  | C           | 0,114 | 1,121 |
| rs6231     | A           | 0,015 | 1,015 |
| rs1282108  | T           | 0,078 | 1,081 |
| rs4957742  | A           | 0,128 | 1,136 |
| rs1054204  | G           | 0,005 | 1,005 |
| rs2910164  | C           | 0,186 | 1,204 |
| rs17284960 | T           | 0,231 | 1,260 |
| rs180012   | G           | 0,012 | 1,012 |
| rs9466056  | A           | 0,220 | 1,246 |
| rs11755164 | T           | 0,103 | 1,108 |
| rs13204965 | A           | 0,085 | 1,089 |
| rs2745426  | T           | 0,217 | 1,242 |

|            |   |       |       |
|------------|---|-------|-------|
| rs17054320 | A | 0,264 | 1,302 |
| rs4869742  | T | 0,075 | 1,078 |
| rs7751941  | G | 0,306 | 1,358 |
| rs9340799  | T | 0,004 | 1,004 |
| rs1514348  | G | 0,141 | 1,151 |
| rs3020314  | C | 0,007 | 1,007 |
| rs1712     | C | 0,147 | 1,158 |
| rs7788807  | C | 0,166 | 1,181 |
| rs10226308 | A | 0,209 | 1,233 |
| rs6959212  | C | 0,103 | 1,109 |
| rs2282930  | G | 0,067 | 1,069 |
| rs1801197  | C | 0,048 | 1,049 |
| rs4727338  | G | 0,121 | 1,129 |
| rs13245690 | G | 0,196 | 1,217 |
| rs3801387  | G | 0,093 | 1,098 |
| rs7812088  | G | 0,058 | 1,060 |
| rs1670346  | A | 0,117 | 1,124 |
| rs1405534  | C | 0,189 | 1,208 |
| rs7017914  | A | 0,188 | 1,207 |
| rs13272568 | A | 0,035 | 1,036 |
| rs7844539  | C | 0,215 | 1,240 |
| rs3102734  | C | 0,137 | 1,147 |
| rs2073618  | C | 0,016 | 1,016 |
| rs2062377  | A | 0,162 | 1,176 |
| rs10756362 | G | 0,036 | 1,037 |
| rs11788458 | G | 0,155 | 1,168 |
| rs4240467  | G | 0,038 | 1,039 |
| rs7851693  | G | 0,075 | 1,078 |
| rs3905706  | T | 0,152 | 1,164 |
| rs10793442 | A | 0,303 | 1,354 |
| rs7071206  | T | 0,083 | 1,087 |
| rs2784767  | T | 0,135 | 1,144 |
| rs7084921  | C | 0,098 | 1,103 |
| rs11602954 | A | 0,250 | 1,284 |
| rs7125774  | T | 0,065 | 1,067 |
| rs9630182  | T | 0,044 | 1,045 |
| rs7108738  | T | 0,028 | 1,028 |
| rs10835187 | C | 0,094 | 1,099 |
| rs163879   | C | 0,107 | 1,113 |
| rs7932354  | C | 0,115 | 1,122 |
| rs198470   | T | 0,563 | 1,756 |
| rs545382   | C | 0,280 | 1,323 |
| rs2277268  | A | 0,662 | 1,938 |
| rs3736228  | T | 0,050 | 1,051 |
| rs5854     | T | 0,107 | 1,113 |
| rs2887571  | G | 0,243 | 1,275 |
| rs11048046 | A | 0,123 | 1,131 |
| rs7953528  | A | 0,022 | 1,022 |
| rs11540149 | A | 0,240 | 1,271 |

|            |   |       |       |
|------------|---|-------|-------|
| rs1544410  | A | 0,142 | 1,153 |
| rs2228570  | A | 0,139 | 1,149 |
| rs2016266  | G | 0,118 | 1,125 |
| rs11614913 | T | 0,156 | 1,169 |
| rs736825   | G | 0,049 | 1,050 |
| rs1053051  | C | 0,060 | 1,062 |
| rs7326472  | G | 0,338 | 1,402 |
| rs1286083  | C | 0,322 | 1,380 |
| rs11623869 | T | 0,075 | 1,078 |
| rs2118784  | A | 0,182 | 1,200 |
| rs28757190 | C | 1,161 | 3,193 |
| rs1062033  | G | 0,005 | 1,005 |
| rs10518716 | C | 0,177 | 1,194 |
| rs9921222  | T | 0,012 | 1,012 |
| rs13336428 | G | 0,235 | 1,265 |
| rs4985155  | G | 0,060 | 1,062 |
| rs1564981  | G | 0,182 | 1,200 |
| rs1566045  | T | 0,351 | 1,420 |
| rs1048146  | A | 0,005 | 1,005 |
| rs4790881  | C | 0,162 | 1,176 |
| rs13464    | A | 0,134 | 1,143 |
| rs4792909  | G | 0,213 | 1,238 |
| rs227584   | C | 0,036 | 1,037 |
| rs1864325  | T | 0,031 | 1,031 |
| rs1061947  | C | 0,200 | 1,221 |
| rs2412298  | G | 0,011 | 1,011 |
| rs1107946  | G | 0,138 | 1,148 |
| rs7226305  | C | 0,163 | 1,177 |
| rs7217932  | G | 0,075 | 1,078 |
| rs1042673  | A | 0,106 | 1,112 |
| rs4796995  | A | 0,293 | 1,340 |
| rs884205   | C | 0,101 | 1,106 |
| rs2717096  | G | 0,204 | 1,226 |
| rs7257450  | A | 0,003 | 1,003 |
| rs10416218 | C | 0,098 | 1,103 |
| rs3790160  | C | 0,221 | 1,247 |
| rs13734    | T | 0,136 | 1,146 |
| rs4817775  | C | 0,154 | 1,166 |
| rs28425    | G | 0,812 | 2,252 |
| rs4820539  | G | 0,170 | 1,185 |
| rs129333   | C | 0,501 | 1,650 |
| rs5934507  | G | 0,152 | 1,164 |
| rs5926033  | C | 0,289 | 1,335 |
| rs5952638  | A | 0,114 | 1,121 |
| rs4492531  | A | 0,044 | 1,045 |
| rs964181   | C | 0,224 | 1,251 |
